# Supplementary material for: Infantile Iron Deficiency Affects Brain Development in Monkeys Even After Treatment of Anemia
Source: Frontiers journal article supplement (doi:10.3389/fnhum.2021.624107), 2021-02-24
Supplement: Data_Sheet_1.pdf [file Data_Sheet_1.pdf]

**Supplemental Table 1.** Ingredient composition, as well as mineral and vitamin concentrations, for the standard diet fed to the pregnant and nursing mothers and then the juvenile monkeys after weaning in this study.<sup>1</sup>

| <b>Fe concentration</b>   | <b>225 mg/kg</b> |
|---------------------------|------------------|
| Ingredients               |                  |
| Protein, %                | 15.7             |
| Carbohydrate, %           | 69.1             |
| Fat, %                    | 6.0              |
| Ash, %                    | 5.3              |
| Fiber (crude), %          | 4.5              |
| Minerals                  |                  |
| Iron <sup>2</sup> , mg/kg | 225.0            |
| Zinc, mg/kg               | 110.0            |
| Copper, mg/kg             | 21.0             |
| Vitamins                  |                  |
| A, IU/g                   | 20.0             |
| B12, mcg/kg               | .073             |
| C, mg/kg                  | 500.0            |

<sup>1</sup>LabDiet, 5LFD

<sup>2</sup>Based on typical daily consumption (200 g) the adult female monkeys were provided approximately 45.0 mg Fe from the biscuit diet each day

**Supplemental Table 2. Diffusion MRI omnibus global p-values**

| Tracts | Variables | Omnibus p-value    |                    |
|--------|-----------|--------------------|--------------------|
| GCC    | Sex       | 0.203              |                    |
|        | Age       | 0.566              |                    |
|        | WB        | 0.797              |                    |
|        | Fe        | 0.291              |                    |
|        | Fe*Sex    | 0.028              |                    |
| SCC    | Sex       | 0.066              |                    |
|        | Age       | 0.459              |                    |
|        | WB        | 0.179              |                    |
|        | Fe        | 0.586              |                    |
|        | Fe*Sex    | 0.293              |                    |
|        |           | Left               | Right              |
| CG     | Sex       | <b>0.003*</b>      | <b>&lt;0.0001*</b> |
|        | Age       | 0.011              | <b>&lt;0.0001*</b> |
|        | WB        | 0.026              | 0.581              |
|        | Fe        | <b>0.001*</b>      | <b>0.001*</b>      |
|        | Fe*Sex    | 0.017              | <b>&lt;0.0001*</b> |
| UF     | Sex       | 0.035              | <b>&lt;0.0001*</b> |
|        | Age       | 0.012              | <b>0.003*</b>      |
|        | WB        | 0.002              | 0.269              |
|        | Fe        | <b>0.003*</b>      | <b>0.004*</b>      |
|        | Fe*Sex    | 0.034              | <b>&lt;0.0001*</b> |
| ILF    | Sex       | <b>&lt;0.0001*</b> | 0.027              |
|        | Age       | 0.017              | 0.139              |
|        | WB        | 0.106              | <b>0.003*</b>      |
|        | Fe        | 0.133              | 0.028              |
|        | Fe*Sex    | 0.725              | 0.048              |

**Diffusion global omnibus *p* values for Left and Right Hemisphere (cont.)**

|     |        | Left               | Right |
|-----|--------|--------------------|-------|
| Opt | Sex    | 0.008              | 0.026 |
|     | Age    | 0.067              | 0.15  |
|     | WB     | <b>&lt;0.0001*</b> | 0.007 |
|     | Fe     | 0.044              | 0.265 |
|     | Fe*Sex | 0.133              | 0.194 |

\**p* value remained significant after Bonferroni correction for number of tracts

**Supplemental Table 3. Number of subjects remaining in the analysis after the profile QC.**

|       | IS | ID |
|-------|----|----|
| GCC   | 20 | 12 |
| SCC   | 26 | 14 |
| CG_L  | 26 | 12 |
| CG_R  | 25 | 12 |
| UF_L  | 25 | 13 |
| UF_R  | 23 | 12 |
| ILF_L | 26 | 14 |
| ILF_R | 26 | 14 |
| Opt_L | 26 | 14 |
| Opt_R | 26 | 14 |

**Supplemental Table 4.** Body weights (gm) of infant monkeys at 2-month intervals from birth through one year of age when the MRI scans were acquired. Mean values (+SE) shown for males and females, as well as for the monkeys that remained continuously iron sufficient (IS) or became transiently iron deficient (ID).

| Age*            | Birth    | 2        | 4         | 6         | 8         | 10         | 12 <sup>@</sup> |
|-----------------|----------|----------|-----------|-----------|-----------|------------|-----------------|
| Male**          |          |          |           |           |           |            |                 |
| IS              | 521 (18) | 774 (28) | 1173 (32) | 1504 (43) | 1891 (47) | 2131 (151) | 2406 (56)       |
| ID <sup>‡</sup> | 530 (20) | 865 (36) | 1145 (24) | 1428 (64) | 1846 (80) | 2107 (91)  | 2407 (92)       |
| Female**        |          |          |           |           |           |            |                 |
| IS              | 512 (16) | 795 (22) | 1156 (43) | 1426 (39) | 1819 (58) | 2096 (71)  | 2328 (76)       |
| ID <sup>‡</sup> | 480 (25) | 740 (39) | 1046 (51) | 1303 (64) | 1656 (88) | 1897 (104) | 2149 (121)      |

\*Significant main effect of age indicative of normal growth,  $p < 0.001$

\*\*Significant main effect of sex, with mean weight for males larger than females,  $p < .05$

<sup>‡</sup>Mean weights for IS and ID infants did not differ. However, 2-way interactions between Age & Iron Status, and Sex & Iron Status in the ANOVA followed by post hoc testing indicated the weights of IS and ID infants differed at 2 time points. At 2 months of age, male ID infants were the largest ( $p < 0.03$ ), whereas at 6 months the ID monkeys tended to be somewhat smaller after the period of anemia than IS monkeys ( $p < 0.08$ ).

<sup>@</sup>Weights at 10 months and then at 12 months of age when the MRI scans were acquired did not differ between IS and ID. The hematology of the previously ID monkeys was also in the normal range at the time of the scans
